# Supplementary material
Source: PubMed Central journal article supplement (PMC5820711)
Supplement: jama-318-1787-s001.pdf [file jama-318-1787-s001.pdf]

## Supplementary Online Content

James MT, Neesh P, Hemmelgarn BR, et al. Derivation and external validation of prediction models for advanced chronic kidney disease following acute kidney injury. *JAMA*. doi:10.1001/jama.2017.16326

**eTable 1.** Diagnostic and procedure codes used to identify comorbidities and procedures in the derivation, internal validation (AKDN) and external validation (ICES) cohorts

**eTable 2.** Predictors of advanced CKD and their frequency in the derivation, internal validation (AKDN) and external validation (ICES) cohorts

**eTable 3.** Frequency, and observed risk of risk categories for 5 prediction models for advanced CKD in the derivation (AKDN) cohort

**eTable 4.** Distribution of model predicted risk of advanced CKD (%) estimated in the derivation, internal validation (AKDN), and external validation (ICES) cohorts

**eTable 5.** Discrimination and calibration of a six-variable model for advanced CKD in the internal validation (AKDN) cohort, stratified by timing of baseline Scr measurement and level of baseline eGFR

**eTable 6.** Predictive performance of models for advanced CKD in the patients excluded from original (AKDN) cohorts due to lack of pre-hospitalization Scr measurements between 7-365 days prior to hospital admission

**eTable 7.** Varying thresholds of predicted risk based on the six-variable risk-index, proportion of patients who would be risk stratified for community CKD follow-up, and corresponding sensitivity, specificity, positive and negative predictive values for progression to advanced CKD during follow-up after a hospitalization with AKI

**eFigure 1.** Calibration of the six-variable (Model 1) and reduced models (Models 2-5) in the internal validation (AKDN) cohort using locally weighted least squares regression smoother plots

**eFigure 2.** Calibration of the six-variable (Model 1) and reduced models (Models 2-5) in the external validation (ICES) cohort using locally weighted least squares regression smoother plots

This supplementary material has been provided by the authors to give readers additional information about their work.

**eTable 1 - Diagnostic and procedure codes used to identify candidate comorbidity and procedure variables in the derivation, internal validation (AKDN) and external validation (ICES) cohorts**

|                                  | Coding Definition                                                                                                                                                                                                                                                |
|----------------------------------|------------------------------------------------------------------------------------------------------------------------------------------------------------------------------------------------------------------------------------------------------------------|
| <b>Comorbidities</b>             |                                                                                                                                                                                                                                                                  |
| Diabetes mellitus                | <i>One hospitalization</i> with an ICD-9-CM code of 250.x, or ICD-10 codes E10-14, excluding codes for gestational diabetes or <i>Two physician claims</i> with an ICD-9 code of 250 <i>within two years</i> .                                                   |
| Hypertension                     | <i>One hospitalization</i> with an ICD-9-CM code of 401-405, or ICD-10 I10-I15, excluding codes for gestational hypertension or <i>Two physician claims</i> with an ICD-9 code (401-405) <i>within two years</i> , excluding codes for gestational hypertension. |
| Myocardial infarction            | ICD-9-CM 410.x, 412.x, or ICD-10 I21.x, I22.x, I25.2                                                                                                                                                                                                             |
| Congestive heart failure         | ICD-9-CM 428.x, or ICD-10 I09.9, I11.0, I13.0, I13.2, I25.5, I42.0, I42.5–I42.9, I43.x, I50.x, P29.0                                                                                                                                                             |
| Peripheral vascular disease      | ICD-9-CM 443.9, 441.x, 785.4, V43.4, or Procedure 38.48, or ICD-10 I70.x, I71.x, I73.1, I73.8, I73.9, I77.1, I79.0, I79.2, K55.1, K55.8, K55.9, Z95.8, Z95.9                                                                                                     |
| Rheumatic disease                | ICD-9-CM 710.0, 710.1, 710.4, 714.0–714.2, 714.81, 725.x, or ICD-10 M05.x, M06.x, M31.5, M32.x–M34.x, M35.1, M35.3, M36.0                                                                                                                                        |
| Mild liver disease               | ICD-9-CM 571.2, 571.4–571.6, or ICD-10 B18.x, K70.0–K70.3, K70.9, K71.3–K71.5, K71.7, K73.x, K74.x, K76.0, K76.2–K76.4, K76.8, K76.9, Z94.4                                                                                                                      |
| Moderate or severe liver disease | ICD-9-CM 456.0–456.21, 572.2–572.8, or ICD-10 I85.0, I85.9, I86.4, I98.2, K70.4, K71.1, K72.1, K72.9, K76.5, K76.6, K76.7                                                                                                                                        |
| Hemiplegia or paraplegia         | ICD9-CM 344.1, 342.x, or ICD-10 G04.1, G11.4, G80.1, G80.2, G81.x, G82.x, G83.0–G83.4, G83.9                                                                                                                                                                     |
| Metastatic solid tumor           | ICD-9-CM 196.x–199.1, or ICD-10 C77.x–C80.x                                                                                                                                                                                                                      |

Comorbidities were identified from hospital discharge records and physician claims using validated ICD-9-CM and ICD-10 coding algorithms, based on the presence of codes recorded from hospitalizations, outpatient encounters, and physician claims up to 3 years prior to the index hospital admission. Procedures during the index hospitalization were identified using previously described approaches. A comorbidity or procedure was considered absent if no representative codes were identified for a participant.

**Abbreviations:** AKDN = Alberta Kidney Disease Network, ICES = Institute for Clinical Evaluative Sciences, ICD = International Classification of Diseases, CCI = Canadian Classification of Health Interventions

**eTable 1 (Continued) - Diagnostic and procedure codes used to identify comorbidities and procedures in the derivation, internal validation (AKDN) and external validation (ICES) cohorts**

|                                  | <b>Coding Definition</b>                                                                                                                                                                                                                                                                                                                                                                                                                                                                              |
|----------------------------------|-------------------------------------------------------------------------------------------------------------------------------------------------------------------------------------------------------------------------------------------------------------------------------------------------------------------------------------------------------------------------------------------------------------------------------------------------------------------------------------------------------|
| <i>Procedures in hospital</i>    |                                                                                                                                                                                                                                                                                                                                                                                                                                                                                                       |
| Mechanical ventilation           | ICD-9-CM Procedure codes 93.90, 93.92, 96.01, 96.04, 96.05, 96.70, 96.71, 96.72, or CCI procedure codes 1.GZ.31, or AH Physician claims 13.62A, or OHIP Physician claims G557, G558, G559, G405, G406, G407,                                                                                                                                                                                                                                                                                          |
| Cardiac catheterization          | ICD-9-CM procedure codes 36.01, 36.02, 36.05, 36.06, or ICD-10 CA/CCI 31P10, 1IJ50, 1IJ5GQ, 1IJ57GQ-AZ, or AH Physician claims 49.96 51.59D, 51.59E, 51.59F, or OHIP Physician claims G296, G297, G299, G300, G301, G304, G305, G306.                                                                                                                                                                                                                                                                 |
| Cardiac surgery                  | ICD-9-CM Procedure codes 36.1x, 36.2x, or ICD-10 CA/CCI 1IJ76, 1HU90, 1HU80, 1HV90, 1HV80, 1HT90, 1HT80, 1HS90, 1HS80, 1HW, or AH Physician claims 47.1, 47.2, 47.3, 47.4, 47.5, 47.7, 47.8, 47.9, 48.0, 48.1, 48.15, 48.19, 48.9, 49.1, 49.2, 49.3, 49.4, 49.5, or OHIP Physician claims Z434, R742, R743, R724, R725, R726, R727, R728, R729, R730, R733, R734, R735, R736, R737, R738, R772, R773, R774, R863, R876, R930.                                                                         |
| Abdominal aortic aneurysm repair | ICD-9-CM Procedure codes 38.34, 38.64, 38.44, 39.71 ICD-10 CA diagnostic code I71.4 plus CCI code 1.KA.80.LA-XXN or 1.KA.80.GQ-NRN, or CCI codes 1.KA.76.MZ-XXN or 1.KA.76.NB-XXN or 1.KA.50.GQ-OA (GQ-BD/GS-BD) or 1.KE.50.GQ-OA (GQ-BD/GS-BD) (note for these 4 CCI codes do not require the ICD-10 diagnostic code)                                                                                                                                                                                |
| Acute dialysis                   | ICD-9-CM Diagnosis codes 584, 584.5, 584.6, 584.7, 584.8, 584.9 plus one of the following Procedure codes 39.95, V45.1, V56.0, V56.1, or ICD-10 Diagnosis codes N17, N17.0, N17.1, N17.2, 17.8, N17.9 plus one of the following ICD-10 CA/CCI Procedure codes 1.PZ.21.HQ-BR, 1.PZ.21.HPD4, 1.PZ.21.HQ-BS, 1.JQ.53.^, 1.JT.53.^ or ICD-10 diagnosis code: Z99.2, Z49.1, Z49.0, or AH Physician claims 1399A and 1399B, or OHIP Physician claims R849, G323, G866, G330, G331, G093, G095, G294, G295.. |

Comorbidities were identified from hospital discharge records and physician claims using validated ICD-9-CM and ICD-10 coding algorithms, based on the presence of codes recorded from hospitalizations, outpatient encounters, and physician claims up to 3 years prior to the index hospital admission. Procedures during the index hospitalization were identified using previously described approaches. A comorbidity or procedure was considered absent if no representative codes were identified for a participant.

**Abbreviations:** AKDN = Alberta Kidney Disease Network, ICES = Institute for Clinical Evaluative Sciences, ICD = International Classification of Diseases, CCI = Canadian Classification of Health Interventions

**eTable 2 – Predictors of advanced CKD and their frequency in the derivation, internal validation (AKDN) and external validation (ICES) cohorts**

| Predictors                   | Derivation (AKDN) Cohort |                      | Internal Validation (AKDN) Cohort |                      | External Validation (ICES) Cohort |                     |
|------------------------------|--------------------------|----------------------|-----------------------------------|----------------------|-----------------------------------|---------------------|
|                              | Full cohort (N=9973)     | Advanced CKD (n=272) | Full cohort (N=4985)              | Advanced CKD (n=136) | Full cohort (N=2761)              | Advanced CKD (n=62) |
| Age (years), n (%)           |                          |                      |                                   |                      |                                   |                     |
| < 65                         | 4266 (42.8)              | 94 (34.6)            | 2094 (42.0)                       | 45 (33.1)            | 938 (34.0)                        | 16 (25.8)           |
| ≥ 65                         | 5707 (57.2)              | 178 (65.4)           | 2891 (58.0)                       | 91 (66.9)            | 1823 (66.0)                       | 46 (74.2)           |
| Sex, n (%)                   |                          |                      |                                   |                      |                                   |                     |
| male                         | 5715 (57.3)              | 145 (53.3)           | 2091 (42.0)                       | 74 (54.4)            | 1654 (59.9)                       | 32 (51.6)           |
| female                       | 4258 (42.7)              | 127 (46.7)           | 2894 (58.0)                       | 62 (45.6)            | 1107 (40.1)                       | 30 (48.4)           |
| AKI‡, n (%)                  |                          |                      |                                   |                      |                                   |                     |
| Stage1                       | 7686 (77.1)              | 136 (50.0)           | 3806 (76.4)                       | 63 (46.3)            | 2165 (78.4)                       | 32 (51.6)           |
| Stage2                       | 1357 (13.6)              | 45 (16.5)            | 699 (14.0)                        | 26 (19.1)            | 356 (12.9)                        | 13 (21.0)           |
| Stage3                       | 930 (9.3)                | 91 (33.4)            | 480 (9.6)                         | 47 (34.6)            | 240 (8.7)                         | 17 (27.4)           |
| Baseline Scr, n (%)          |                          |                      |                                   |                      |                                   |                     |
| < 1.0 mg/dL                  | 5906 (59.2)              | 97(35.7)             | 2985 (59.9)                       | 43 (31.6)            | 1555 (56.3)                       | 20 (32.3)           |
| ≥ 1.0 mg/dL                  | 4067 (40.8)              | 175 (64.3)           | 2000 (40.1)                       | 93 (68.4)            | 1206 (43.7)                       | 42 (67.7)           |
| Discharge Scr (mg/dL), n (%) |                          |                      |                                   |                      |                                   |                     |
| <1.0                         | 3394 (34.0)              | 13 (4.8)             | 1721 (34.5)                       | 8 (5.9)              | 1057 (38.3)                       | 7 (11.3)            |
| 1.0-<1.3                     | 3207 (32.2)              | 37 (13.6)            | 1542 (30.9)                       | 22 (16.2)            | 912 (33.0)                        | 13 (21.0)           |
| 1.3-<1.6                     | 1963 (19.7)              | 63 (23.2)            | 1012 (20.3)                       | 21 (15.4)            | 532 (19.3)                        | 14 (22.6)           |
| 1.6-<1.9                     | 799 (8.0)                | 41 (15.1)            | 383 (7.7)                         | 25 (18.4)            | 153 (5.5)                         | 7 (11.3)            |
| ≥ 1.9                        | 610 (6.1)                | 118 (43.4)           | 327 (6.6)                         | 60 (44.1)            | 107 (3.9)                         | 21 (33.9)           |
| Albuminuria§, n (%)          |                          |                      |                                   |                      |                                   |                     |
| Normal                       | 3775 (37.8)              | 63 (23.2)            | 1881 (37.7)                       | 21 (15.4)            | 798 (28.9)                        | 49 (18.1)           |
| Mild                         | 1373 (13.8)              | 38 (14.0)            | 662 (13.3)                        | 22 (16.2)            | 137 (5.0)                         | 6 (9.7)             |
| Heavy                        | 494 (5.0)                | 39 (14.3)            | 243 (4.9)                         | 20 (14.7)            | 56 (2.0)                          | ≤5 (<8)             |
| Unmeasured                   | 4331 (43.4)              | 132 (48.5)           | 2199 (44.1)                       | 73 (53.7)            | 1770 (64.1)                       | ≤5 (<8)             |

‡ **AKI Stage:** Stage 1 = Scr increase ≥0.3mg/dL or 1.5-1.9 times baseline within index hospitalization, Stage 2 = Scr increase 2.0-2.9 times baseline within index hospitalization, Stage 3 = Scr increase ≥3.0 times baseline or ≥4.0mg/dL or acute dialysis within index hospitalization.

§ **Albuminuria:** Normal = Albumin/Creatinine Ratio (ACR) < 30 mg/g or Dipstick urinalysis protein negative, Mild= ACR 30-300 mg/g or Dipstick urinalysis protein trace or 1+, Heavy=ACR > 300 mg/g or Dipstick urinalysis protein ≥ 2+. To convert urine ACR to mg/mmol, multiply by 0.113.

**Abbreviations:** AKDN = Alberta Kidney Disease Network, ICES = Institute for Clinical Evaluative Sciences, Scr = Serum creatinine, AKI = Acute Kidney Injury  
 The mean (SD) baseline Scr was 1.0 (0.2) mg/dL for all cohorts. The mean (SD) discharge eGFR was 62 (22) mL/min/1.73m<sup>2</sup> in the derivation and internal validation (AKDN) cohorts and 59 (22) mL/min/1.73m<sup>2</sup> in the external validation (ICES) cohort.  
 To convert serum creatinine to μmol/L, multiply by 88.4.

**eTable 3 - Frequency, and observed risk of risk categories for 5 prediction models for advanced CKD in the derivation (AKDN) cohort**

| Model   | Independent Variables                                         | Predicted Risk Category | Sample Size (%) in Each Predicted Risk Category (%) | Advanced CKD, N (%) |
|---------|---------------------------------------------------------------|-------------------------|-----------------------------------------------------|---------------------|
| Model 1 | Age, Sex, AKI stage, Baseline Scr, Discharge Scr, Albuminuria | <1%                     | 5228 (52.4)                                         | 23 (0.4)            |
|         |                                                               | 1-<5%                   | 3512 (35.2)                                         | 70 (2.0)            |
|         |                                                               | 5-<10%                  | 626 (6.2)                                           | 51 (8.2)            |
|         |                                                               | 10-<20%                 | 360 (3.6)                                           | 70 (19.4)           |
|         |                                                               | ≥20                     | 247 (2.5)                                           | 58 (23.5)           |
| Model 2 | Age, Sex, AKI stage, Baseline Scr, Discharge Scr              | <1%                     | 5116 (51.3)                                         | 23 (0.4)            |
|         |                                                               | 1-<5%                   | 3569 (35.8)                                         | 67 (1.9)            |
|         |                                                               | 5-<10%                  | 689 (6.9)                                           | 61 (8.8)            |
|         |                                                               | 10-<20%                 | 363 (3.6)                                           | 68 (18.7)           |
|         |                                                               | ≥20                     | 236 (2.3)                                           | 53 (22.5)           |
| Model 3 | Age, Sex, AKI stage, Baseline Scr                             | <1%                     | 3124 (31.3)                                         | 11 (0.4)            |
|         |                                                               | 1-<5%                   | 5617 (57.3)                                         | 133 (2.4)           |
|         |                                                               | 5-<10%                  | 860 (8.6)                                           | 81 (9.4)            |
|         |                                                               | 10-<20%                 | 267 (2.6)                                           | 30 (11.2)           |
|         |                                                               | ≥20                     | 105 (1.0)                                           | 17 (16.2)           |
| Model 4 | Age, Sex, Discharge Scr                                       | <1%                     | 5260 (52.7)                                         | 26 (0.49)           |
|         |                                                               | 1-<5%                   | 3532 (35.4)                                         | 78 (2.2)            |
|         |                                                               | 5-<10%                  | 531 (5.3)                                           | 45 (8.5)            |
|         |                                                               | 10-<20%                 | 477 (4.8)                                           | 87 (18.2)           |
|         |                                                               | ≥20                     | 173 (1.7)                                           | 36 (20.8)           |
| Model 5 | Age, Sex, AKI stage                                           | <1%                     | 176 (1.8)                                           | 0 (0)               |
|         |                                                               | 1-<5%                   | 8857 (88.8)                                         | 181 (2.0)           |
|         |                                                               | 5-<10%                  | 516 (5.2)                                           | 49 (9.5)            |
|         |                                                               | 10-<20%                 | 424 (4.2)                                           | 42 (9.9)            |
|         |                                                               | ≥20                     | 0 (0)                                               | 0 (0)               |

There was a total of N=9973 patients in the derivation (AKDN) cohort, with 272 advanced CKD events in the derivation cohort (AKDN)

**Abbreviations:** CKD = Chronic Kidney Disease, AKDN = Alberta Kidney Disease Network, ICES = Institute for Clinical Evaluative Sciences, Scr = Serum creatinine

**eTable 4 - Distribution of model predicted risk of advanced CKD (%) estimated in the derivation, internal validation (AKDN), and external validation (ICES) cohorts**

| Cohort                     | Model | Percentile of Predicted Risk |      |      |      |      |       |         |
|----------------------------|-------|------------------------------|------|------|------|------|-------|---------|
|                            |       | minimum                      | 5th  | 25th | 50th | 75th | 95th  | maximum |
| Derivation (AKDN)          | 1     | 0.03                         | 0.13 | 0.39 | 0.92 | 2.47 | 11.70 | 63.58   |
| Internal validation (AKDN) |       | 0.04                         | 0.13 | 0.39 | 0.92 | 2.54 | 11.86 | 50.36   |
| External validation (ICES) |       | 0.07                         | 0.16 | 0.44 | 0.93 | 2.58 | 9.76  | 61.71   |
| Derivation (AKDN)          | 2     | 0.04                         | 0.15 | 0.42 | 0.95 | 2.54 | 12.11 | 49.16   |
| Internal validation (AKDN) |       | 0.05                         | 0.15 | 0.42 | 0.96 | 2.59 | 12.49 | 47.46   |
| External validation (ICES) |       | 0.05                         | 0.14 | 0.40 | 0.81 | 2.33 | 8.54  | 48.40   |
| Derivation (AKDN)          | 3     | 0.07                         | 0.37 | 0.84 | 1.59 | 3.16 | 8.58  | 49.56   |
| Internal validation (AKDN) |       | 0.09                         | 0.36 | 0.83 | 1.61 | 3.26 | 8.54  | 33.66   |
| External validation (ICES) |       | 0.09                         | 0.42 | 0.92 | 1.64 | 3.29 | 8.33  | 39.69   |
| Derivation (AKDN)          | 4     | 0.11                         | 0.20 | 0.50 | 0.90 | 2.54 | 14.05 | 38.87   |
| Internal validation (AKDN) |       | 0.11                         | 0.11 | 0.50 | 0.91 | 2.56 | 14.15 | 37.14   |
| External validation (ICES) |       | 0.16                         | 0.19 | 0.49 | 0.80 | 2.29 | 6.89  | 36.13   |
| Derivation (AKDN)          | 5     | 0.76                         | 1.15 | 1.56 | 1.91 | 2.50 | 9.55  | 16.75   |
| Internal validation (AKDN) |       | 0.77                         | 1.16 | 1.56 | 1.93 | 2.54 | 9.66  | 15.40   |
| External validation (ICES) |       | 1.08                         | 1.33 | 1.65 | 1.97 | 2.48 | 9.78  | 15.08   |

**Independent variables included in models:** Model 1 = Age, Sex, AKI stage, Baseline Scr, Discharge Scr, Albuminuria; Model 2 = Age, Sex, AKI stage, Baseline Scr, Discharge Scr; Model 3 = Age, Sex, AKI stage, Baseline Scr, Model 4 = Age, Sex, Discharge Scr, Model 5 = Age, sex, AKI stage.

There was a total of N=9973 patients in the derivation (AKDN) cohort, with 272 advanced CKD events in the derivation cohort (AKDN), N=4985 patients with 136 advanced CKD events in the internal validation (AKDN) cohort, and N=2761 patients with 62 advanced CKD events in the external validation (ICES) cohort. The predicted risk of patients excluded from the cohorts due to no follow-up eGFR values was a median 0.87 (IQR 0.31-2.06) using model 1 in the derivation (AKDN) cohort.

**Abbreviations:** CKD = Chronic Kidney Disease, AKDN = Alberta Kidney Disease Network, ICES = Institute for Clinical Evaluative Sciences, Scr = Serum creatinine

**eTable 5 – Discrimination and calibration of a six-variable model for advanced CKD in the internal validation (AKDN) cohort, stratified by timing of baseline Scr measurement and level of baseline eGFR**

| Strata                                   | Advanced CKD, n (%) | Calibration intercept (p-value) | Calibration slope (p-value) | C statistic (95%CI) |
|------------------------------------------|---------------------|---------------------------------|-----------------------------|---------------------|
| <b>Timing of baseline Scr</b>            |                     |                                 |                             |                     |
| ≤ 3 months prior to admission (N=2918)   | 63 (2.1)            | -0.36 (0.22)                    | 0.90 (0.28)                 | 0.83 (0.77, 0.89)   |
| > 3 months prior to admission (N=2067)   | 73 (3.5)            | 0.48 (0.073)                    | 1.19 (0.063)                | 0.89 (0.86, 0.93)   |
| <b>Level of baseline eGFR</b>            |                     |                                 |                             |                     |
| ≥ 60 mL/min/1.73m <sup>2</sup> (N=3765)  | 57 (1.5)            | -0.53 (0.052)                   | 0.89 (0.18)                 | 0.85 (0.80, 0.90)   |
| 45-59 mL/min/1.73m <sup>2</sup> (N=1221) | 79 (6.5)            | 0.44 (0.15)                     | 1.15 (0.24)                 | 0.82 (0.77, 0.86)   |

**Six-variable model for advanced CKD:** Independent variables included in the model were Age, Sex, AKI stage, Baseline Scr, Discharge Scr, and Albuminuria

There was a total of N=4985 patients with 136 advanced CKD events in the internal validation (AKDN) cohort

**Abbreviations:** AKDN = Alberta Kidney Disease Network, CKD = Chronic Kidney Disease, AKDN = Alberta Kidney Disease Network, eGFR = estimated Glomerular Filtration Rate, Scr = Serum creatinine

**eTable 6 - Predictive performance of models for advanced CKD in the patients excluded from original (AKDN) cohorts due to lack of pre-hospitalization Scr measurements between 7-365 days prior to hospital admission**

|                                                   | Models                                                         |                                                   |                                    |                               |                               |
|---------------------------------------------------|----------------------------------------------------------------|---------------------------------------------------|------------------------------------|-------------------------------|-------------------------------|
|                                                   | Model 1                                                        | Model 2                                           | Model 3                            | Model 4                       | Model 5                       |
|                                                   | Age, sex, AKI stage, Baseline Scr*, Discharge Scr, Albuminuria | Age, sex, AKI stage, Baseline Scr*, Discharge Scr | Age, sex, AKI stage, Baseline Scr* | Age, sex, Discharge Scr       | Age, sex, AKI stage           |
| Calibration intercept (p-value)                   | -0.48 (0.17)                                                   | -0.472 (0.18)                                     | -1.06 (0.09)                       | -0.46 (0.21)                  | -1.5 (0.03)                   |
| Calibration slope (p-value)                       | 0.92 (0.42)                                                    | 0.888 (0.27)                                      | 0.80 (0.08)                        | 0.89 (0.28)                   | 0.67 (0.09)                   |
| C statistic (95%CI)                               | 0.85 (0.79, 0.90)                                              | 0.84 (0.79, 0.89)                                 | 0.79 (0.74, 0.84)                  | 0.84 (0.78, 0.89)             | 0.66 (0.60, 0.72)             |
| Difference in C statistics (95% CI), p-value      | Reference ¥                                                    | 0.01 (-0.01, 0.01),<br>0.44                       | 0.06 (0.03, 0.09),<br><0.001       | 0.007 (-0.01, 0.02),<br>0.357 | 0.19 (0.11, 0.26),<br><0.001  |
| IDI (95%CI) %, p-value                            |                                                                | 0.3 (-0.3, 0.8),<br>0.31                          | 3.5 (0.18, 0.052),<br><0.001       | 1.7 (0.6, 2.9),<br>0.003      | 6.1 (3.7, 8.5),<br><0.001     |
| Continuous NRI (95% CI) %, p value                |                                                                | 9.7 (-1.6, 21.0),<br>0.50                         | 73.1 (45.9, 100.3),<br><0.001      | 57.0 (32.6, 81.4),<br><0.001  | 92.0 (66.0, 118.0),<br><0.001 |
| Categorical NRI (95% CI) % <sup>§</sup> , p-value |                                                                | 4.8 (-3.0, 12.4),<br>0.25                         | 42.6 (24.3, 60.8),<br><0.001       | 11.8 (0.9, 22.8),<br>0.05     | 84.7 (63.3, 106.2),<br><0.001 |
| NRI events <sup>‡</sup> (%)                       |                                                                | 4 (8.2)                                           | 11 (22.4)                          | 9 (18.3)                      | 15 (30.6)                     |
| NRI non-events (%)                                |                                                                | -99 (-3.4)                                        | 583 (20.1)                         | -189 (-6.5)                   | 1568 (54.1)                   |
| Overall NRI (%)                                   | -95 (4.8)                                                      | 594 (42.6)                                        | -180 (11.8)                        | 1583 (84.7)                   |                               |

\***Baseline Scr:** The closest value to the admission date, including values with 7 days prior to hospital admission were used

§ **Risk categories:** <1%, 1-<5%, 5-<10%, 10-<20% and ≥20%.

‡ NRI events refers to development of advanced CKD and NRI non-events refers to no development of advanced CKD.

¥ **Reference:** Each reduced model (model 2-5) was compared to the full model (model 1). For model comparisons differences in the C statistic, IDI, and NRI values greater than 0 indicate better performance for the full model (model 1) than the reduced model.

**Abbreviations:** Scr = Serum creatinine, AKDN = Alberta Kidney Disease Network, IDI = Integrated Discrimination Improvement, NRI = Net Reclassification Improvement  
There was a total of N=2,946 patients included in this analysis, with 49 advanced CKD events.



**eTable 7 - Varying thresholds of predicted risk based on the six-variable risk-index, proportion of patients who would be risk stratified for community CKD follow-up, and corresponding sensitivity, specificity, positive and negative predictive values for progression to advanced CKD during follow-up after a hospitalization with AKI**

|                                                        | Threshold for community CKD follow-up |                  |                  |                  |                  |
|--------------------------------------------------------|---------------------------------------|------------------|------------------|------------------|------------------|
|                                                        | All patients                          | Predicted risk   |                  |                  |                  |
|                                                        |                                       | >1%              | >5%              | >10%             | >20%             |
| Risk score                                             | Any                                   | ≥ 9              | ≥ 15             | ≥ 18             | ≥ 20             |
| Patients risk stratified to community CKD follow-up, % | 100                                   | 48.0             | 13.2             | 6.2              | 2.6              |
| Sensitivity, % (95% CI)                                | NA                                    | 91.9 (86.0-95.9) | 69.8 (61.4-77.4) | 48.5 (39.9-57.2) | 29.4 (21.9-37.8) |
| Specificity, % (95% CI)                                | NA                                    | 53.2 (51.8-54.6) | 88.3 (87.4-89.2) | 95.0 (94.2-95.5) | 98.1 (97.7-98.5) |
| Positive Predictive Value, % 95% CI)                   | NA                                    | 5.2 (4.4-6.2)    | 14.4 (11.8-17.3) | 21.2 (16.8-26.2) | 30.5 (22.8-39.2) |
| Negative Predictive Value, % (95% CI)                  | NA                                    | 99.6 (99.2-99.8) | 99.0 (98.7-99.3) | 98.5 (98.1-98.8) | 98.0 (97.6-98.4) |

**Abbreviations:** CKD = Chronic kidney disease, AKI = Acute kidney injury, NA = Not applicable  
Observed values obtained from the internal validation (AKDN) cohort

**eFigure 1 – Calibration of the six-variable (Model 1) and reduced models (Models 2-5) in the internal validation (AKDN) cohort using locally weighted least squares regression smoother plots**

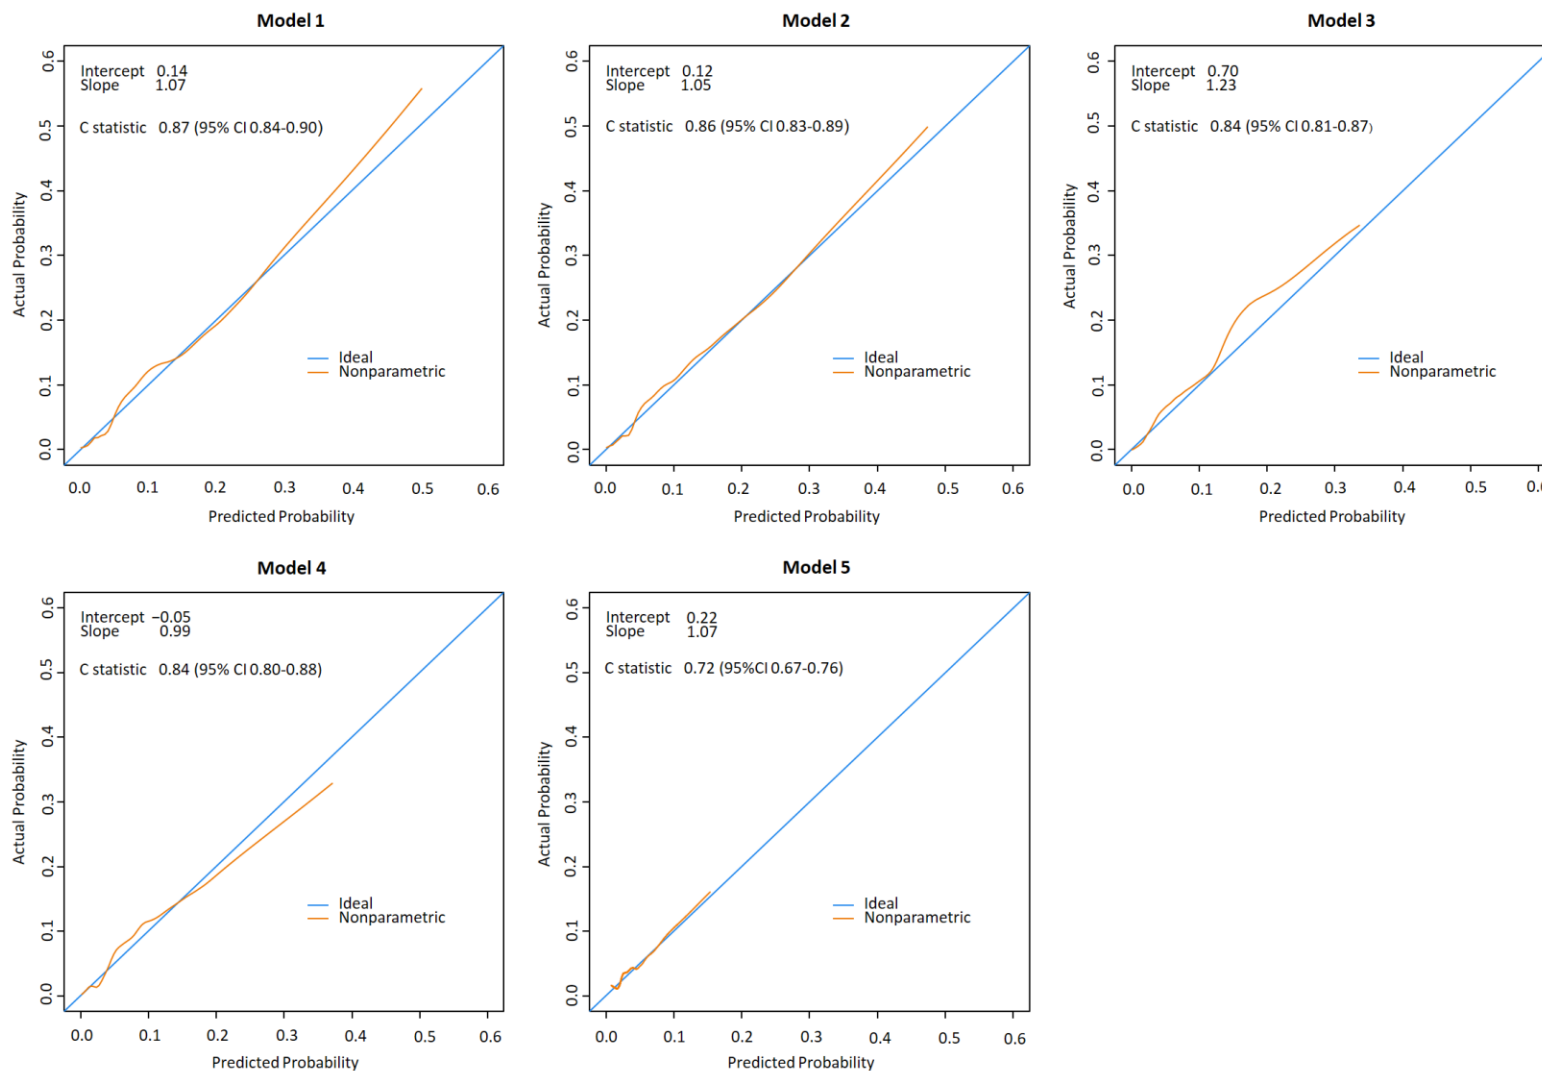

**Independent variables included in models:** Model 1 = Age, Sex, AKI stage, Baseline Scr, Discharge Scr, Albuminuria; Model 2 = Age, Sex, AKI stage, Baseline Scr, Discharge Scr; Model 3 = Age, Sex, AKI stage, Baseline Scr, Model 4 = Age, Sex, Discharge Scr, Model 5 = Age, sex, AKI stage.

There was a total of N=4,985 patients in the internal validation (AKDN) cohort

**Abbreviations:** AKDN = Alberta Kidney Disease Network, CI = Confidence Interval

**eFigure 2 – Calibration of the six-variable (Model 1) and reduced models (Models 2-5) in the external validation (ICES) cohort using locally weighted least squares regression smoother plots**

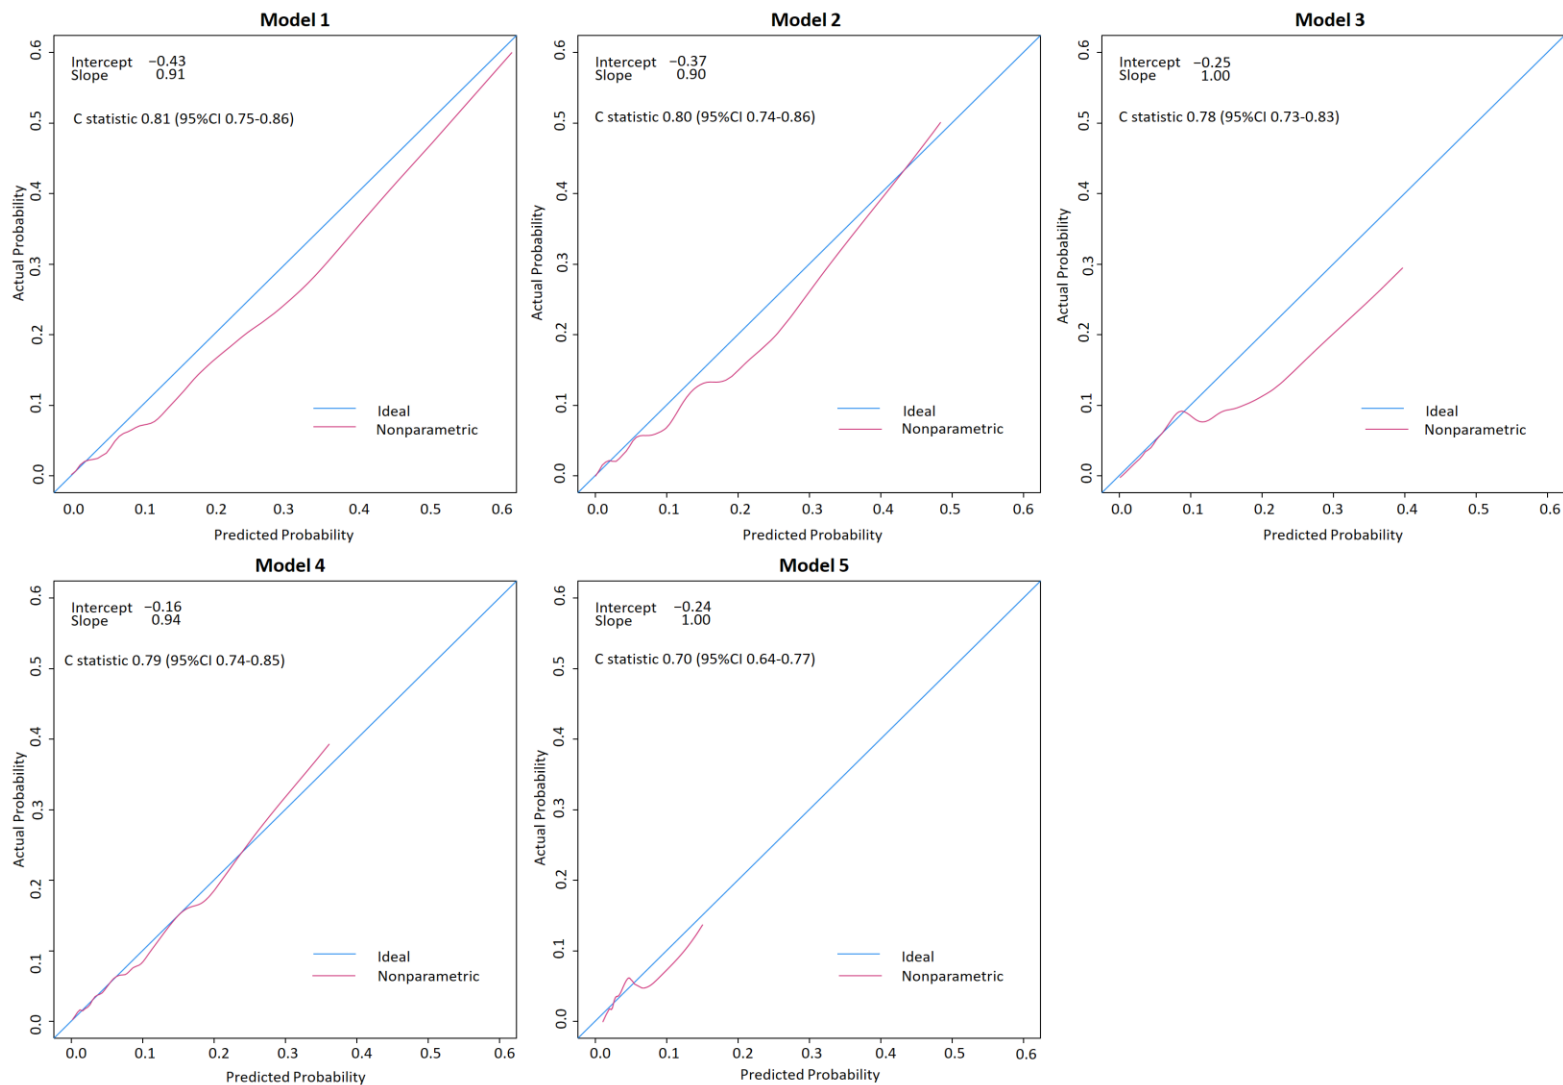

**Independent variables included in models:** Model 1 = Age, Sex, AKI stage, Baseline Scr, Discharge Scr, Albuminuria; Model 2 = Age, Sex, AKI stage, Baseline Scr, Discharge Scr; Model 3 = Age, Sex, AKI stage, Baseline Scr, Model 4 = Age, Sex, Discharge Scr, Model 5 = Age, sex, AKI stage.

There was a total of N=2,761 patients in the external validation (ICES) cohort.

**Abbreviations:** ICES = Institute for Clinical Evaluative Sciences, CI = Confidence Interval
